# Supplementary material
Source: PubMed Central journal article supplement (PMC4598306)
Supplement: NIHMS720080-supplement-3.pdf [file NIHMS720080-supplement-3.pdf]

**INVENTORY OF SUPPLEMENTAL INFORMATION**

SUPPLEMENTAL EXPERIMENTAL PROCEDURES

SUPPLEMENTAL FIGURE LEGENDS 1-3

SUPPLEMENTAL DATA LEGEND 1

SUPPLEMENTAL FIGURES 1-3

SUPPLEMENTAL DATA 1
