# Supplementary material
Source: PubMed Central journal article supplement (PMC4598306)

A

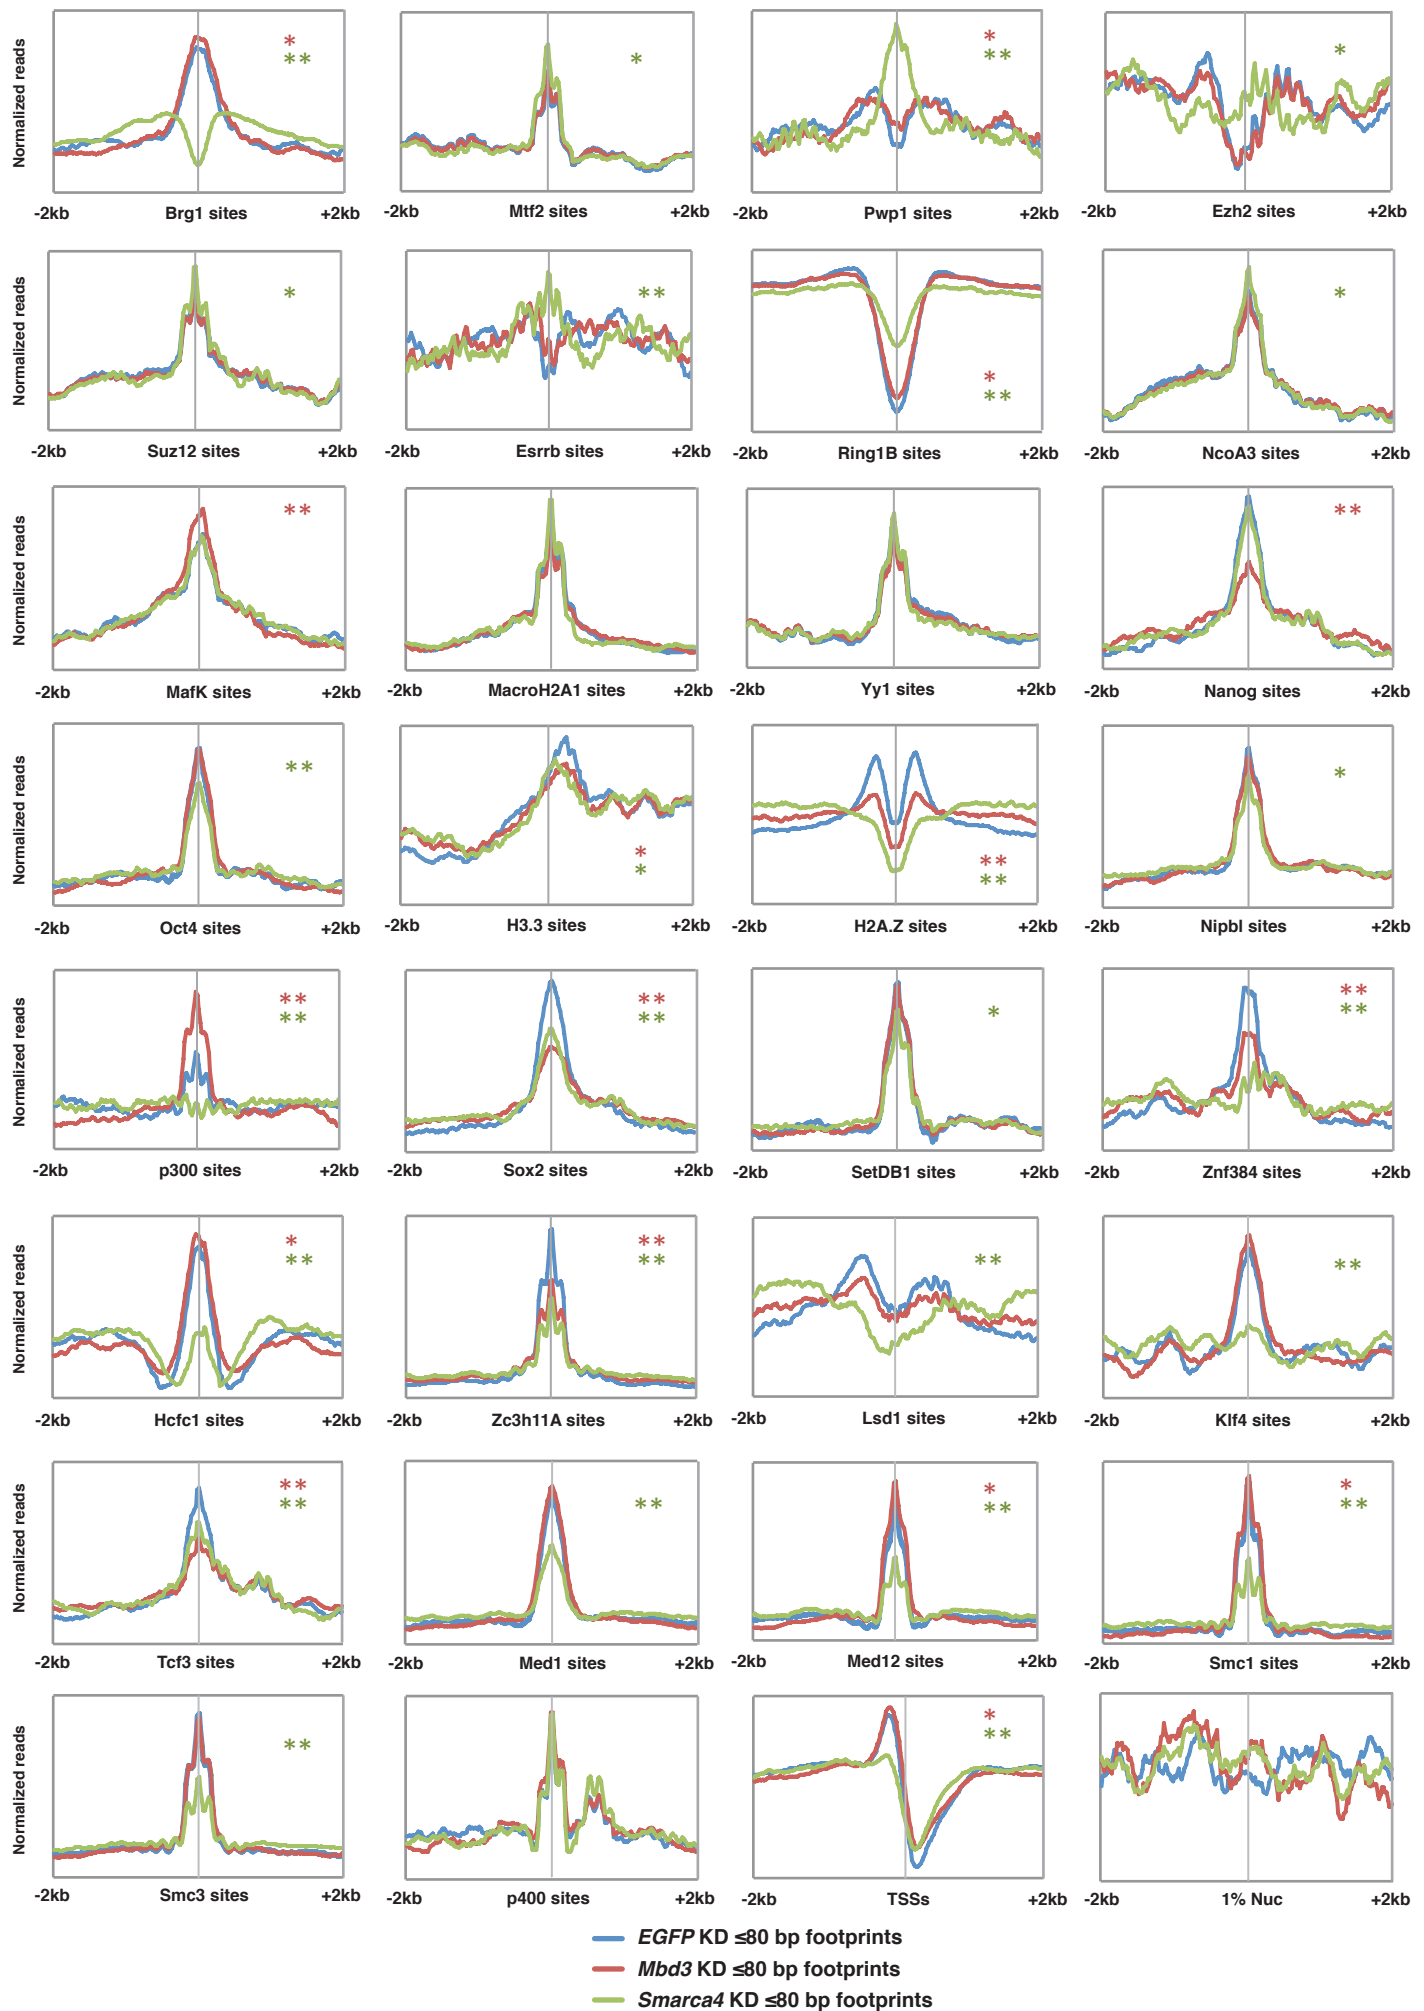

B

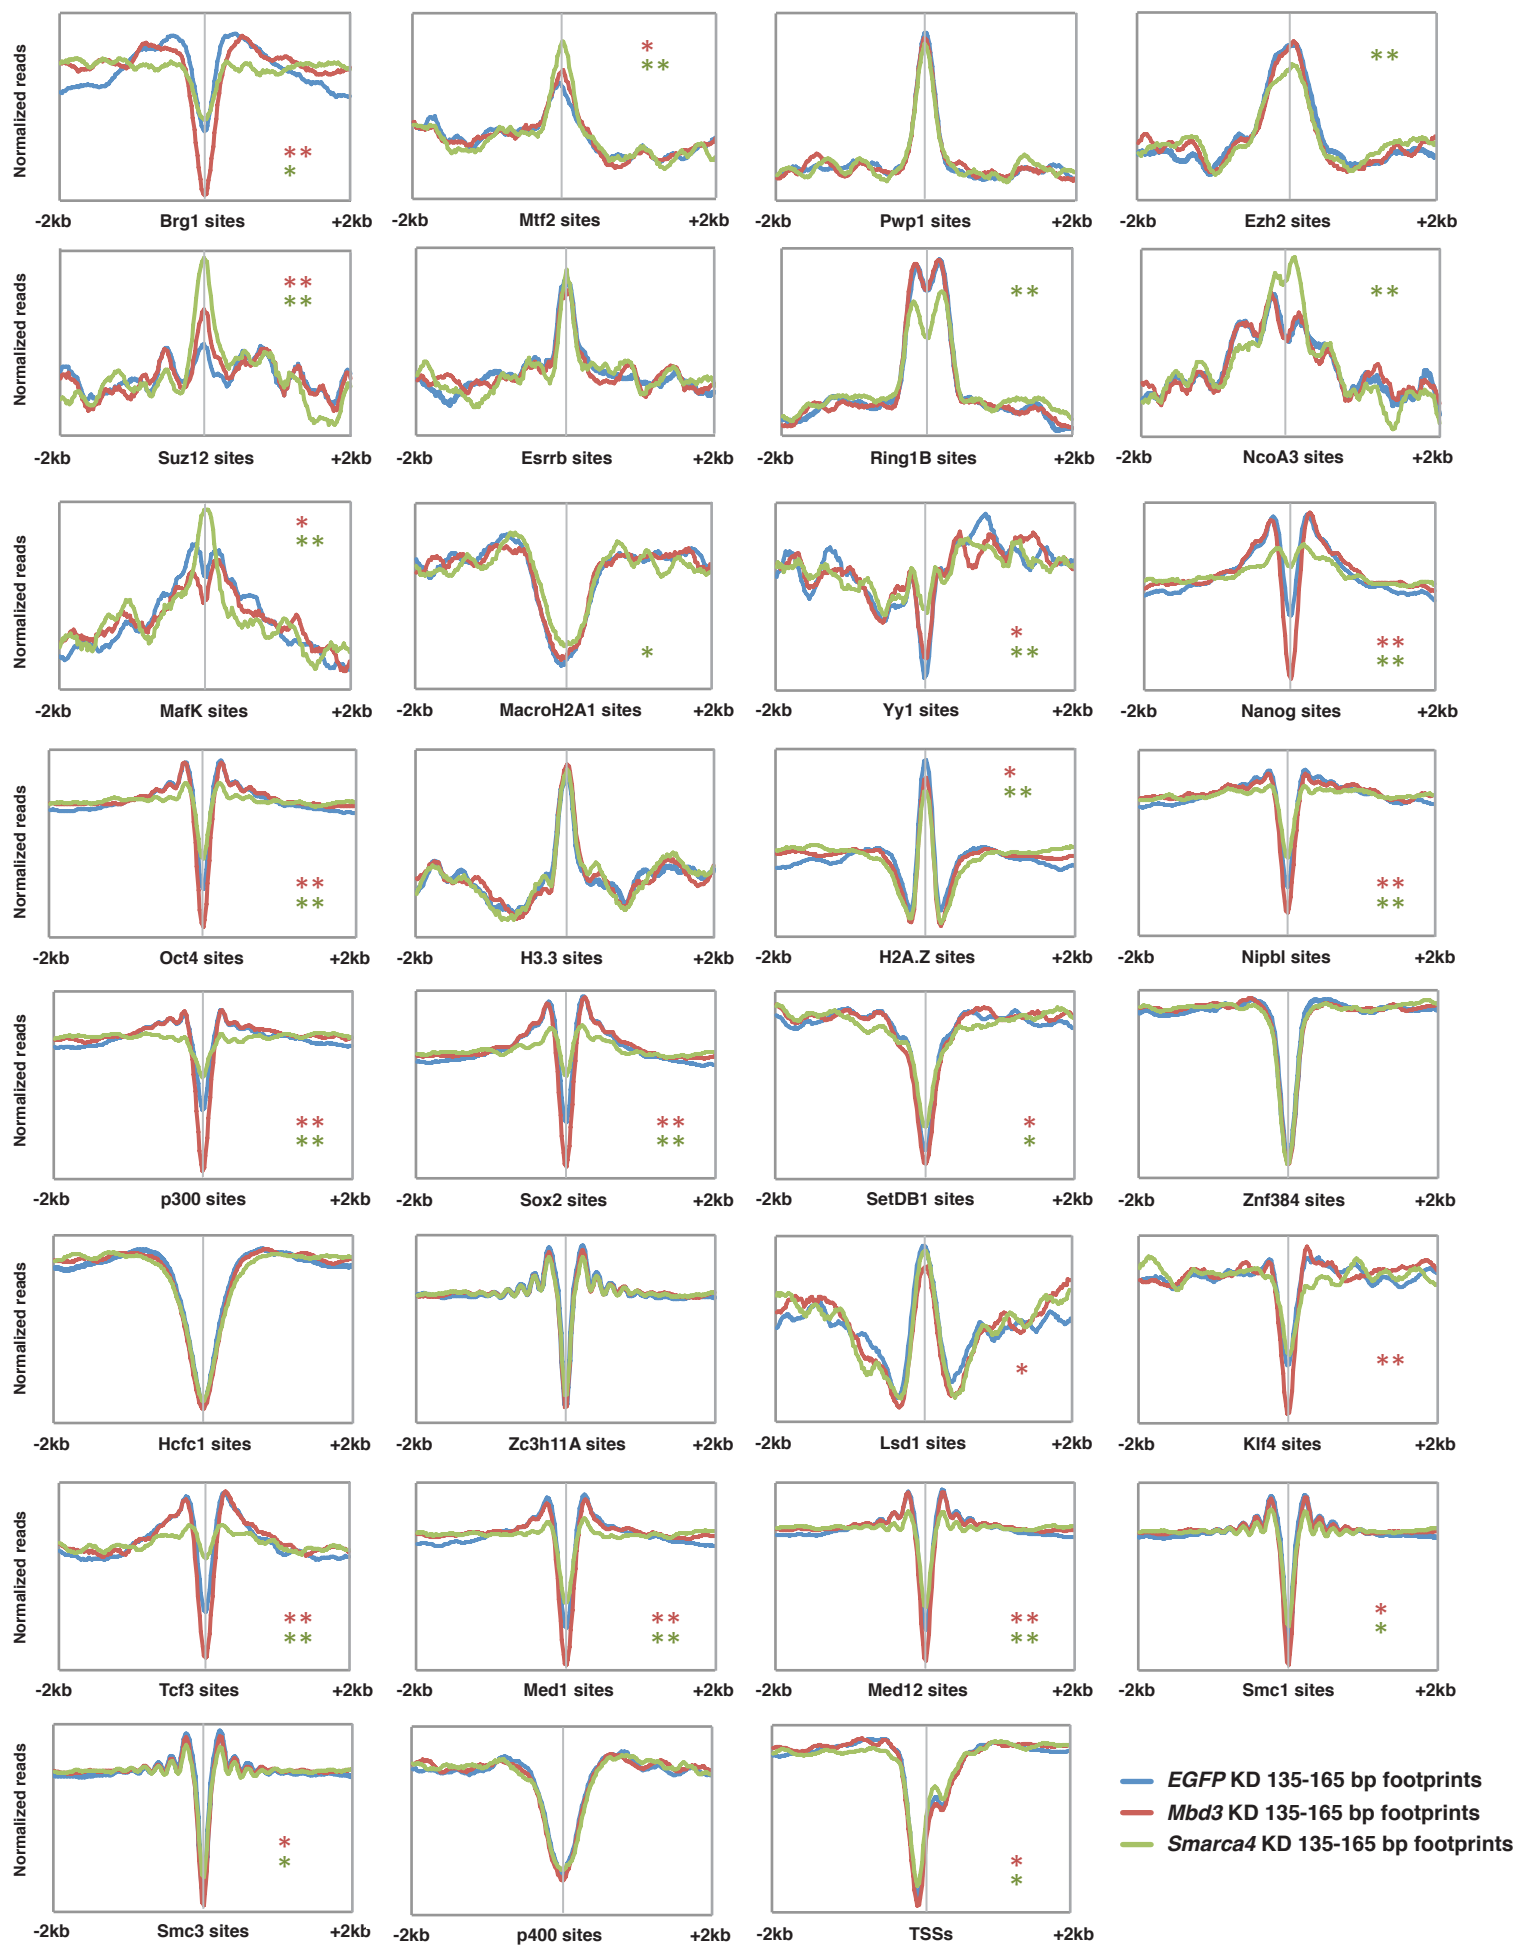

C

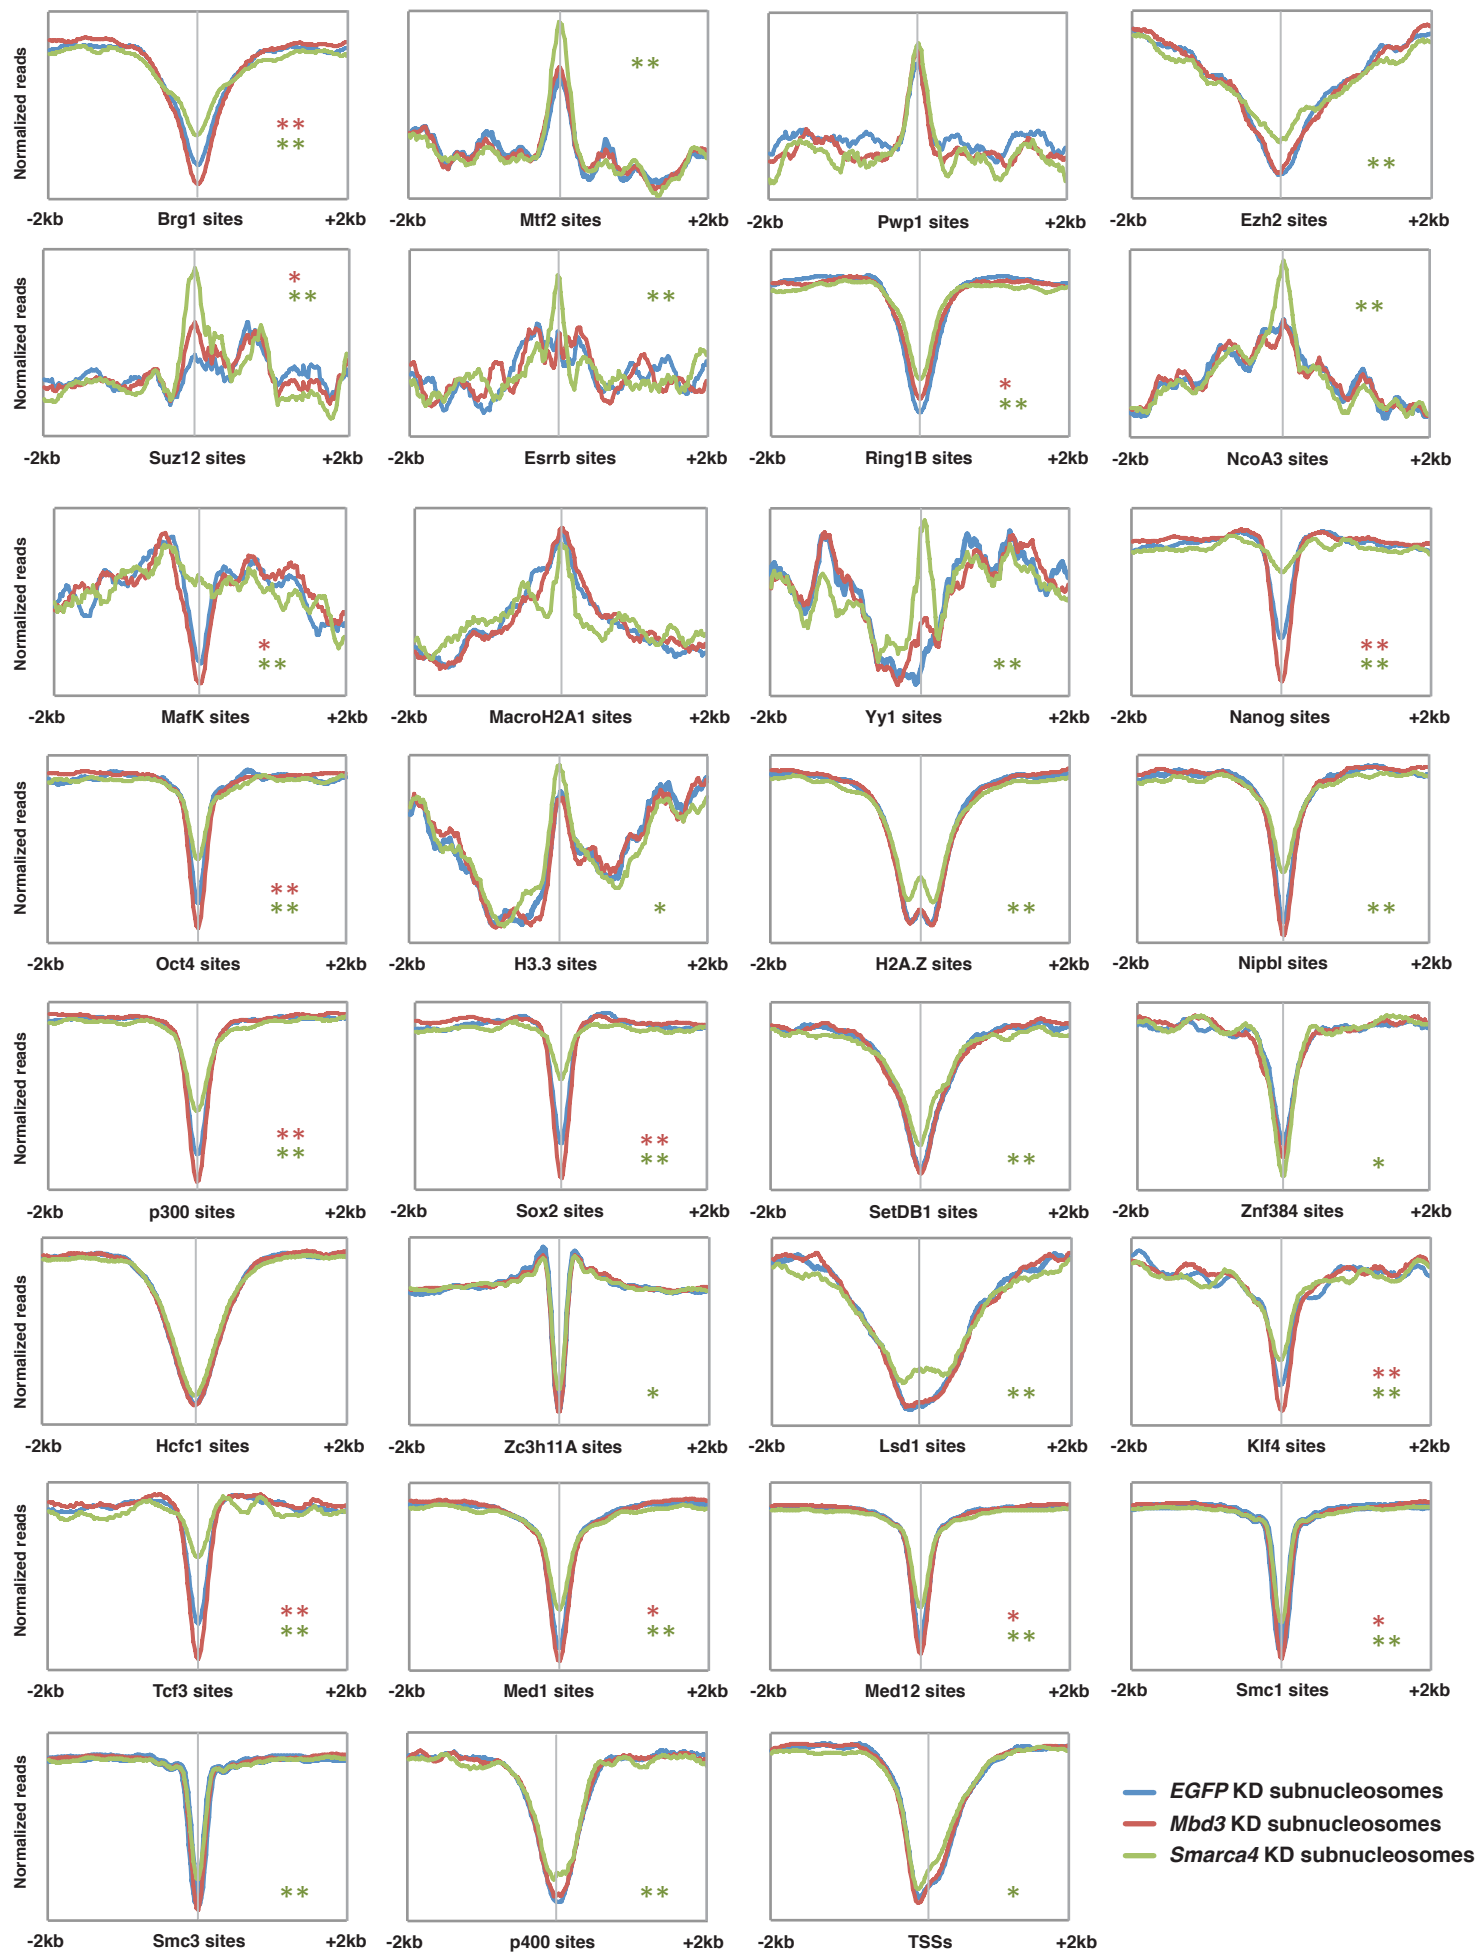

Supplement: NIHMS720080-supplement-2.pdf [file NIHMS720080-supplement-2.pdf]
